# Supplementary material for: Orthologs of Arabidopsis thaliana stomatal bHLH genes and regulation of stomatal development in grasses
Source: Oxford University Press journal article supplement (doi:10.1242/dev.032938), 2009-06-05
Supplement: dev032938supptables.pdf [file dev032938supptables.pdf]

**Table S1. Protein identities in bHLH domains among *Arabidopsis*, rice and maize bHLHs**

| Gene           | <i>AtFAMA</i> | <i>OsFAMA</i> | <i>ZmFAMA</i> | <i>AtMUTE</i> | <i>OsMUTE</i> | <i>ZmMUTE</i> | <i>AtSPCH</i> | <i>OsSPCH1</i> | <i>ZmSPCH1</i> | <i>OsSPCH2</i> | <i>ZmSPCH2</i> |
|----------------|---------------|---------------|---------------|---------------|---------------|---------------|---------------|----------------|----------------|----------------|----------------|
| <i>AtFAMA</i>  | ID            | 0.94          | 0.92          | 0.75          | 0.75          | 0.81          | 0.75          | 0.73           | 0.71           | 0.75           | 0.75           |
| <i>OsFAMA</i>  | –             | ID            | 0.98          | 0.77          | 0.77          | 0.83          | 0.73          | 0.73           | 0.69           | 0.73           | 0.73           |
| <i>ZmFAMA</i>  | –             | –             | ID            | 0.77          | 0.75          | 0.81          | 0.71          | 0.71           | 0.67           | 0.71           | 0.71           |
| <i>AtMUTE</i>  | –             | –             | –             | ID            | 0.90          | 0.92          | 0.79          | 0.77           | 0.77           | 0.81           | 0.81           |
| <i>OsMUTE</i>  | –             | –             | –             | –             | ID            | 0.92          | 0.73          | 0.75           | 0.75           | 0.79           | 0.79           |
| <i>ZmMUTE</i>  | –             | –             | –             | –             | –             | ID            | 0.75          | 0.73           | 0.73           | 0.77           | 0.77           |
| <i>AtSPCH</i>  | –             | –             | –             | –             | –             | –             | ID            | 0.83           | 0.88           | 0.92           | 0.92           |
| <i>OsSPCH1</i> | –             | –             | –             | –             | –             | –             | –             | ID             | 0.92           | 0.92           | 0.92           |
| <i>ZmSPCH1</i> | –             | –             | –             | –             | –             | –             | –             | –              | ID             | 0.96           | 0.96           |
| <i>OsSPCH2</i> | –             | –             | –             | –             | –             | –             | –             | –              | –              | ID             | 1              |
| <i>ZmSPCH2</i> | –             | –             | –             | –             | –             | –             | –             | –              | –              | –              | ID             |

ID, identical.

**Table S2. Overall protein identities among *Arabidopsis*, rice and maize stomatal bHLHs**

| Gene           | <i>AtFAMA</i> | <i>OsFAMA</i> | <i>ZmFAMA</i> | <i>AtMUTE</i> | <i>OsMUTE</i> | <i>ZmMUTE</i> | <i>AtSPCH</i> | <i>OsSPCH1</i> | <i>ZmSPCH1</i> | <i>OsSPCH2</i> | <i>ZmSPCH2</i> |
|----------------|---------------|---------------|---------------|---------------|---------------|---------------|---------------|----------------|----------------|----------------|----------------|
| <i>AtFAMA</i>  | ID            | 0.27          | 0.33          | 0.37          | 0.34          | 0.39          | 0.19          | 0.17           | 0.19           | 0.19           | 0.22           |
| <i>OsFAMA</i>  | –             | ID            | 0.56          | 0.16          | 0.18          | 0.17          | 0.16          | 0.17           | 0.16           | 0.18           | 0.18           |
| <i>ZmFAMA</i>  | –             | –             | ID            | 0.19          | 0.19          | 0.19          | 0.17          | 0.19           | 0.20           | 0.18           | 0.19           |
| <i>AtMUTE</i>  | –             | –             | –             | ID            | 0.49          | 0.55          | 0.21          | 0.17           | 0.20           | 0.20           | 0.24           |
| <i>OsMUTE</i>  | –             | –             | –             | –             | ID            | 0.61          | 0.20          | 0.19           | 0.23           | 0.23           | 0.26           |
| <i>ZmMUTE</i>  | –             | –             | –             | –             | –             | ID            | 0.22          | 0.19           | 0.22           | 0.22           | 0.25           |
| <i>AtSPCH</i>  | –             | –             | –             | –             | –             | –             | ID            | 0.23           | 0.28           | 0.28           | 0.30           |
| <i>OsSPCH1</i> | –             | –             | –             | –             | –             | –             | –             | ID             | 0.48           | 0.37           | 0.35           |
| <i>ZmSPCH1</i> | –             | –             | –             | –             | –             | –             | –             | –              | ID             | 0.44           | 0.43           |
| <i>OsSPCH2</i> | –             | –             | –             | –             | –             | –             | –             | –              | –              | ID             | 0.60           |
| <i>ZmSPCH2</i> | –             | –             | –             | –             | –             | –             | –             | –              | –              | –              | ID             |

ID, identical.
